# Supplementary material for: pH and Reduction Dual-Responsive Bi-Drugs Conjugated Dextran Assemblies for Combination Chemotherapy and In Vitro Evaluation
Source: MDPI journal article supplement (doi:10.3390/polym13091515), 2021-05-08
Supplement: s1 [file polymers-1172944-supplementary.pdf › polymers-1172944-supplementary.pdf]

## Supporting Information

# pH and Reduction Dual-Responsive Bi-Drugs Conjugated Dextran Assemblies for Combination Chemotherapy and In Vitro Evaluation

Xiukun Xue <sup>1</sup>, Yanjuan Wu <sup>1,\*</sup>, Xiao Xu <sup>2</sup>, Ben Xu <sup>1</sup>, Zhaowei Chen <sup>2,\*</sup> and Tianduo Li <sup>1,\*</sup>

<sup>1</sup> Shandong Provincial Key Laboratory of Molecular Engineering, School of Chemistry and Chemical Engineering, Qilu University of Technology (Shandong Academy of Science), Jinan 250353, China; Jasonxue@yeah.net (X.X.); xuben2019@126.com (B.X.)

<sup>2</sup> Institute of Food Safety and Environment Monitoring, College of Chemistry, Fuzhou University, Fuzhou 350108, China; 201310023@fzu.edu.cn

\* Correspondence: wuyanjuan5@qlu.edu.cn (Y.W.); chenzyw@fzu.edu.cn (Z.C.); yltpt6296@vip.163.com (T.L.)

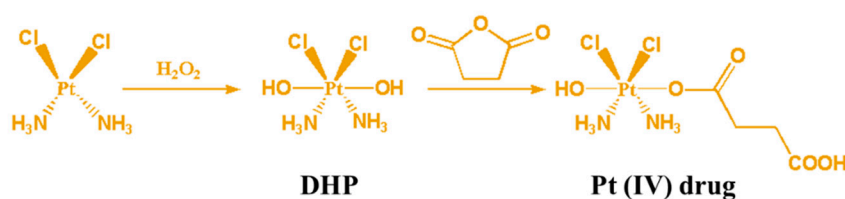

**Scheme S1.** Synthetic scheme of the DHP (diamminedichloro-dihydroxyplatinum) and Pt (IV) prodrug (succinic anhydride modified DHP).

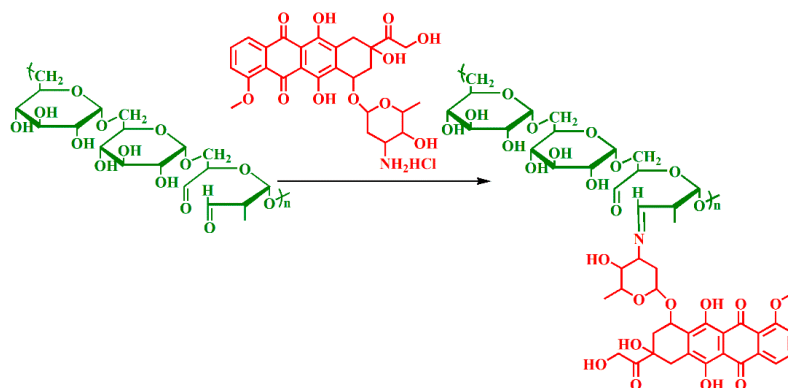

**Scheme S2.** Synthetic scheme of the oDex-g-DOX (DOX conjugated oxidized dextran).

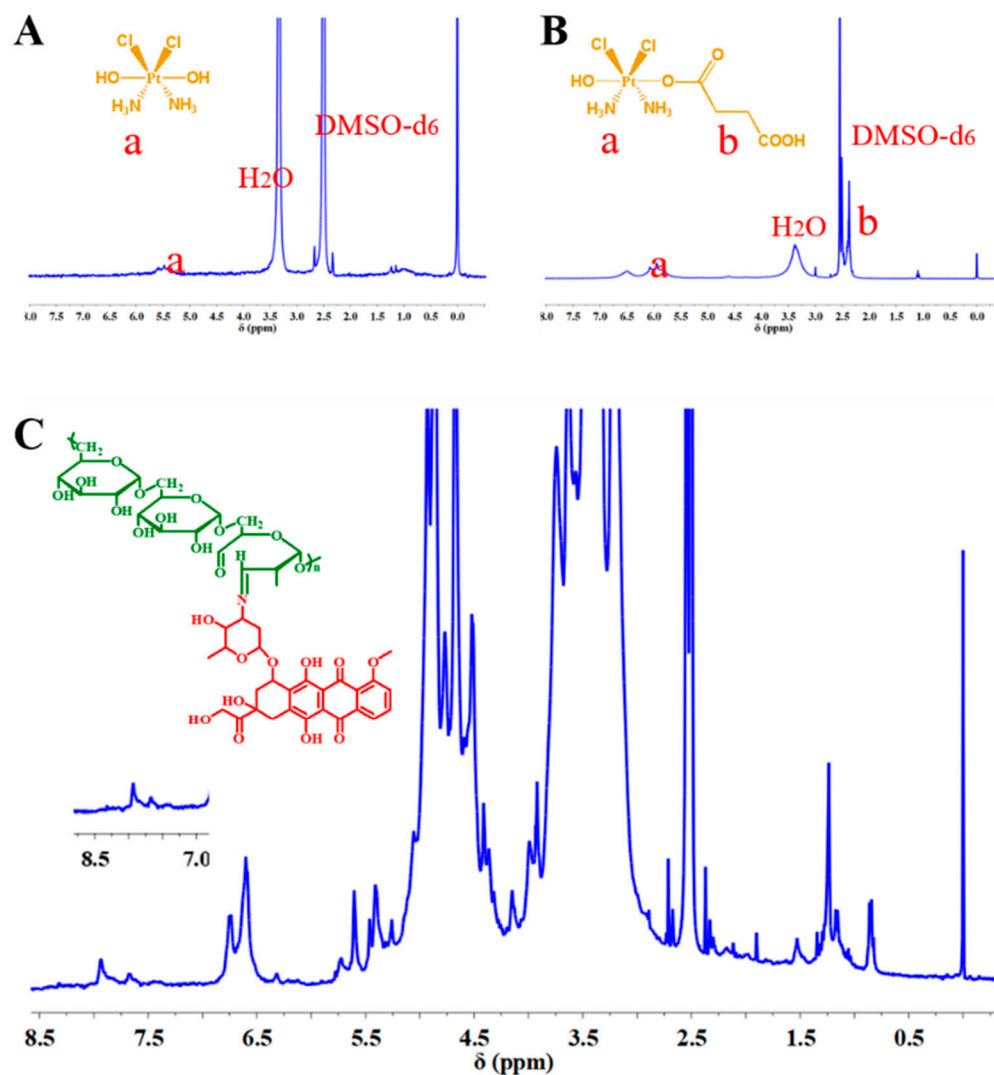

**Figure S1.** The  $^1\text{H}$  NMR spectra of DHP (diamminedichloro-dihydroxyplatinum) (A), Pt (IV) prodrug (succinic anhydride modified DHP) (B), and oDex-g-DOX (DOX conjugated oxidized dextran) (C) in  $\text{DMSO-d}_6$ .

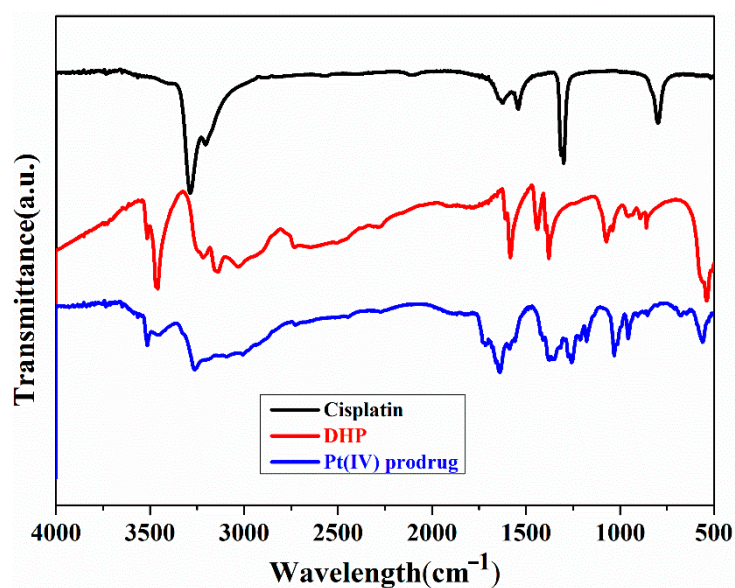

**Figure S2.** Fourier-transform infrared spectra (FT-IR) spectra of the cisplatin, DHP (diamminedichloro-dihydroxyplatinum) and Pt (IV) prodrug (succinic anhydride modified DHP).

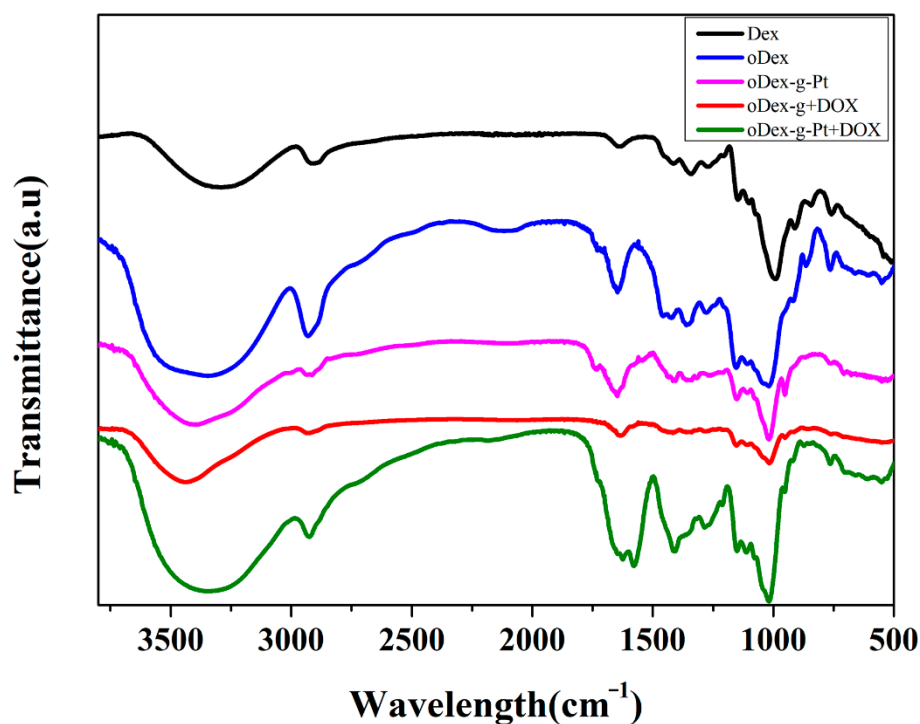

**Figure S3.** Fourier-transform infrared spectra (FT-IR) spectra of the Dex (dextran), oDex (oxidized dextran), oDex-g-Pt (platinum conjugated oxidized dextran), oDex-g-DOX (DOX conjugated oxidized dextran) and oDex-g-Pt+DOX (platinum plus DOX conjugated oxidized dextran).

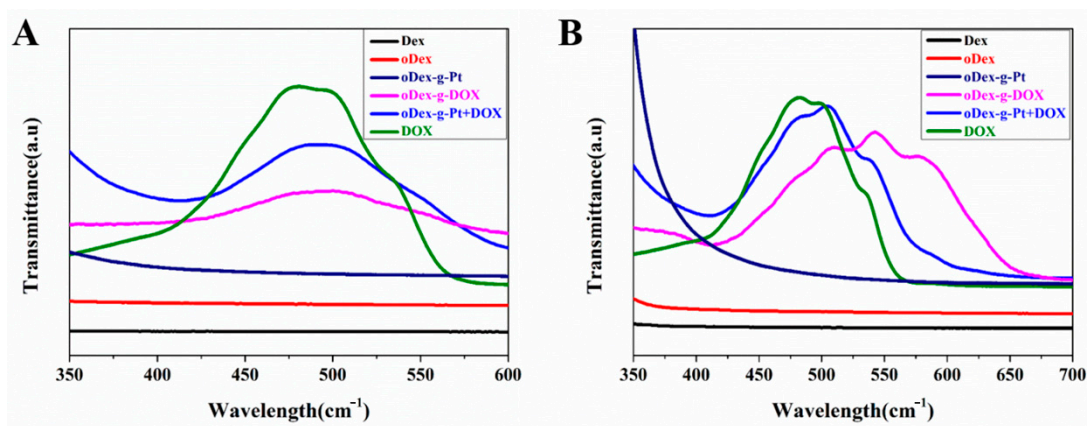

**Figure S4.** UV-visible spectrum of DOX, Dex (dextran), oDex (oxidized dextran), oDex-g-Pt (platinum conjugated oxidized dextran), oDex-g-DOX (DOX conjugated oxidized dextran) and oDex-g-Pt+DOX (platinum plus DOX conjugated oxidized dextran) in aqueous solution (A) and DMSO (B).

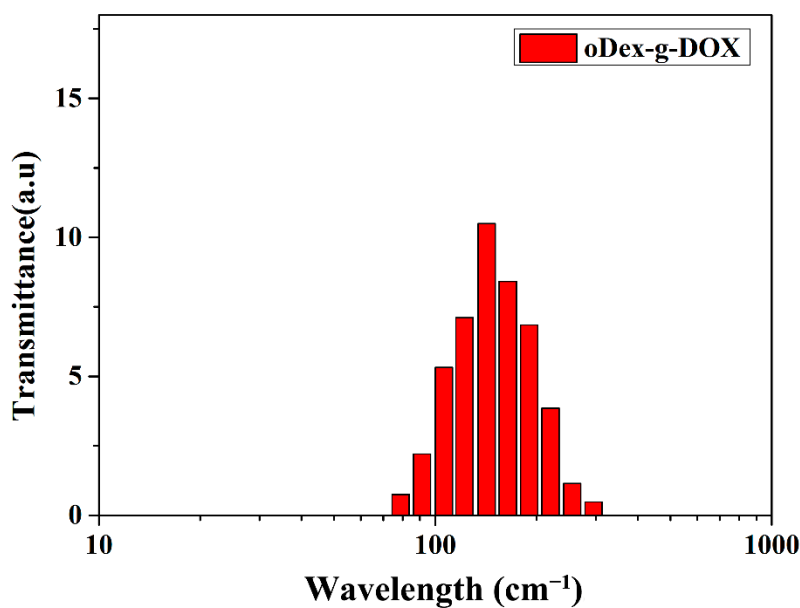

**Figure S5.** Size and size distribution of oDex-g-DOX NPs (DOX conjugated oxidized dextran nanoparticles).

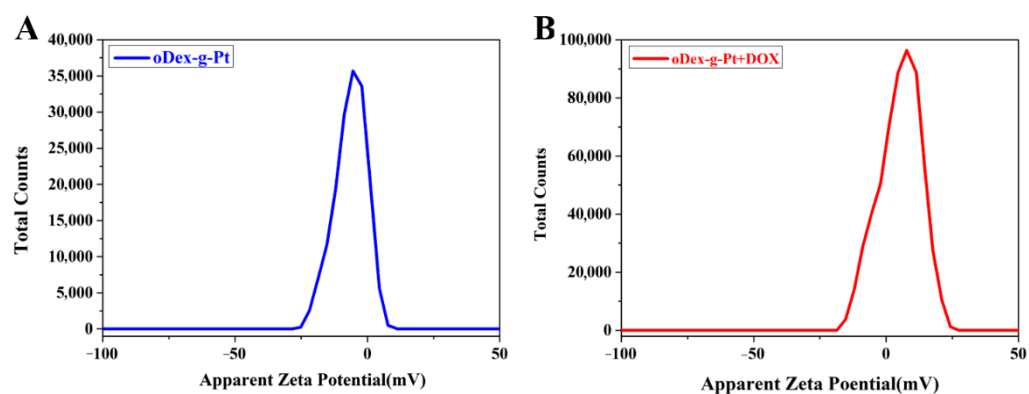

**Figure S6.** Zeta potential measurement of oDex-g-Pt (platinum conjugated oxidized dextran) (A) and oDex-g-Pt+DOX (platinum plus DOX conjugated oxidized dextran) (B).

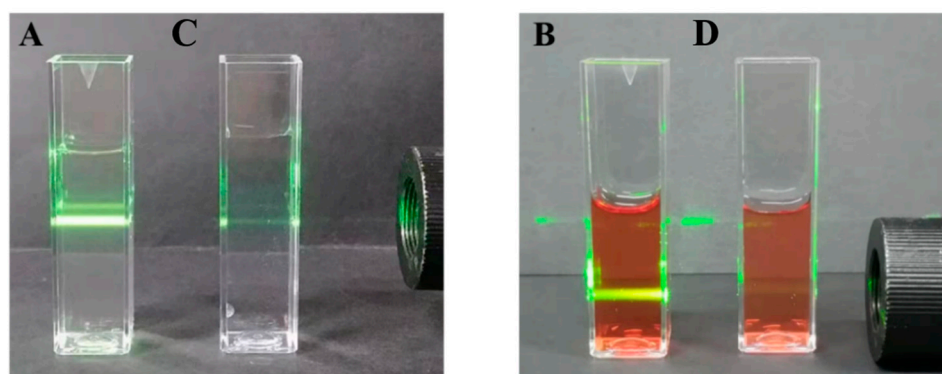

**Figure S7.** Tyndall effect seen for oDex-g-Pt NPs (platinum conjugated oxidized dextran nanoparticles) (A), oDex-g-Pt NPs cultured in pH 7.4 with 10 mM GSH for 24 h (B), oDex-g-Pt+DOX NPs (platinum plus DOX conjugated oxidized dextran nanoparticles) (C), and oDex-g-Pt+DOX NPs cultured in pH 5.0 with 10 mM GSH for 24 h (D).

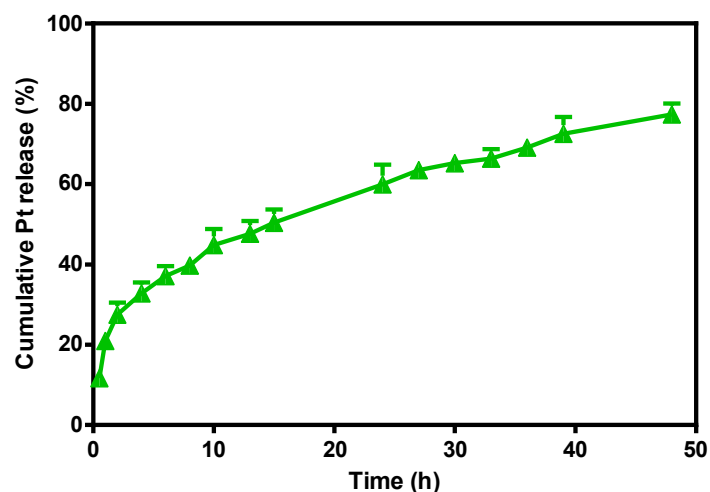

**Figure S8.** Drugs release profiles. Pt release behaviors from oDex-g-Pt+DOX NPs (platinum plus DOX conjugated oxidized dextran nanoparticles) in the presence of 20 mM GSH.

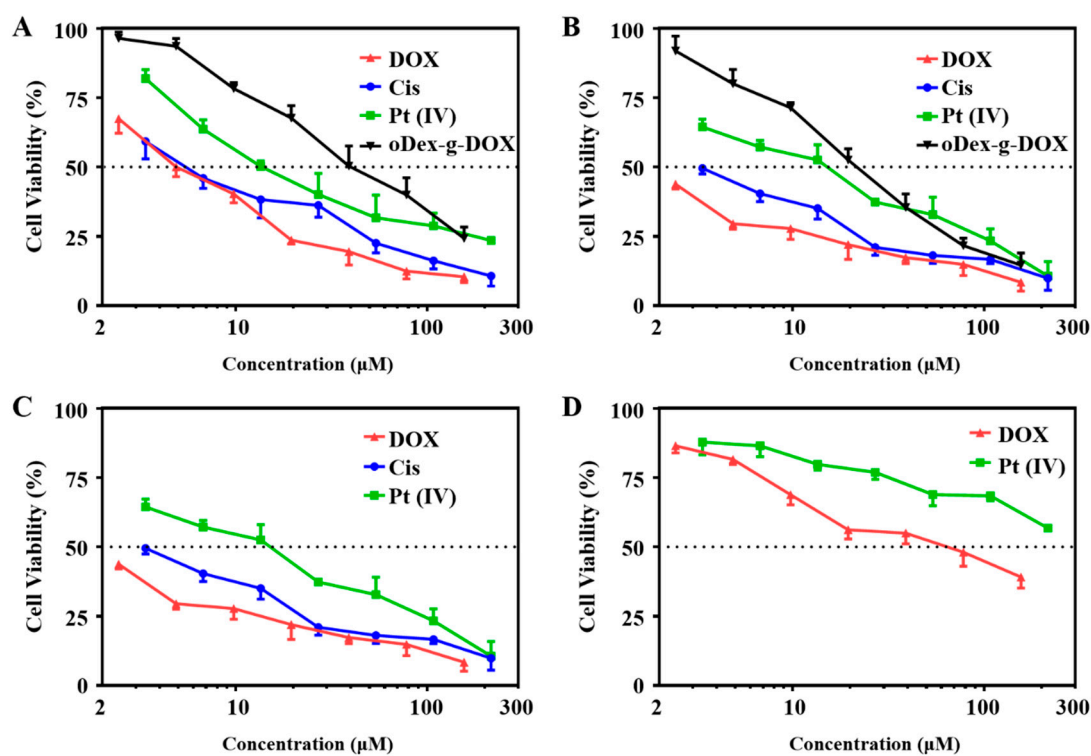

**Figure S9.** *In vitro* anti-cancer efficacy of drugs and nanodrugs. Cell viability curves of HeLa cells incubated with drugs and nanodrugs for 48 h (A) or 72 h (B). Cell viability curves of A549 cells (C) and A549/DDP cells (D) after incubation with drugs and nanodrugs for 48 h.
